# Supplementary material
Source: PubMed Central journal article supplement (PMC9878991)
Supplement: NIHMS1861566-supplement-1.pdf [file NIHMS1861566-supplement-1.pdf]

Supplementary: Table 1

| General data | Evaluation of 20 cells   |                  |                                             |                                            |                                            | Evaluation of 60 cells   |                  |                                             |                                            |                                            | Comparison of results  |                        |
|--------------|--------------------------|------------------|---------------------------------------------|--------------------------------------------|--------------------------------------------|--------------------------|------------------|---------------------------------------------|--------------------------------------------|--------------------------------------------|------------------------|------------------------|
|              | high-level amplification |                  |                                             | intermediate-level amplification           | low-level amplification                    | high-level amplification |                  |                                             | intermediate-level amplification           | low-level amplification                    | Results after 20 cells | Results after 60 cells |
|              | MET/CEP Ratio $\geq 2$   | MET GCN $\geq 6$ | $\geq 10\%$ of cells with MET-GCN $\geq 15$ | $\geq 50\%$ of cells with MET-GCN $\geq 5$ | $\geq 40\%$ of cells with MET-GCN $\geq 4$ | MET/CEP Ratio $\geq 2$   | MET GCN $\geq 6$ | $\geq 10\%$ of cells with MET-GCN $\geq 15$ | $\geq 50\%$ of cells with MET-GCN $\geq 5$ | $\geq 40\%$ of cells with MET-GCN $\geq 4$ |                        |                        |
| 1            | no                       | no               | no                                          | no                                         | 55% $\geq 4$                               | no                       | no               | no                                          | no                                         | 48% $\geq 4$                               | low-level              | low-level              |
| 2            | no                       | no               | no                                          | no                                         | no                                         | no                       | no               | no                                          | no                                         | no                                         | negative               | negative               |
| 3            | no                       | no               | no                                          | no                                         | no                                         | no                       | no               | no                                          | no                                         | no                                         | negative               | negative               |
| 4            | no                       | no               | no                                          | no                                         | no                                         | no                       | no               | no                                          | no                                         | no                                         | negative               | negative               |
| 5            | no                       | no               | no                                          | no                                         | no                                         | no                       | no               | no                                          | no                                         | no                                         | negative               | negative               |
| 6            | no                       | no               | no                                          | no                                         | no                                         | no                       | no               | no                                          | no                                         | no                                         | negative               | negative               |
| 7            | no                       | no               | no                                          | no                                         | no                                         | no                       | no               | no                                          | no                                         | no                                         | negative               | negative               |
| 8            | no                       | no               | no                                          | no                                         | no                                         | no                       | no               | no                                          | no                                         | no                                         | negative               | negative               |
| 9            | no                       | no               | no                                          | no                                         | 50% $\geq 4$                               | no                       | no               | no                                          | no                                         | 60% $\geq 4$                               | low-level              | low-level              |
| 10           | no                       | no               | no                                          | no                                         | no                                         | no                       | no               | no                                          | no                                         | no                                         | negative               | negative               |
| 11           | no                       | no               | no                                          | no                                         | no                                         | no                       | no               | no                                          | no                                         | no                                         | negative               | negative               |
| 12           | no                       | no               | no                                          | no                                         | no                                         | no                       | no               | no                                          | no                                         | no                                         | negative               | negative               |
| 13           | no                       | no               | no                                          | no                                         | no                                         | no                       | no               | no                                          | no                                         | no                                         | negative               | negative               |
| 14           | no                       | no               | no                                          | no                                         | no                                         | no                       | no               | no                                          | no                                         | no                                         | negative               | negative               |
| 15           | no                       | no               | no                                          | no                                         | no                                         | no                       | no               | no                                          | no                                         | no                                         | negative               | negative               |
| 16           | no                       | no               | no                                          | no                                         | no                                         | no                       | no               | no                                          | no                                         | no                                         | negative               | negative               |
| 17           | no                       | no               | no                                          | no                                         | no                                         | no                       | no               | no                                          | no                                         | no                                         | negative               | negative               |
| 18           | no                       | no               | no                                          | no                                         | no                                         | no                       | no               | no                                          | no                                         | no                                         | negative               | negative               |
| 19           | 5.67                     | 11.90            | 45% $\geq 15$                               | no                                         | no                                         | 5.08                     | 10.67            | 28% $\geq 15$                               | no                                         | no                                         | high-level             | high-level             |
| 20           | no                       | no               | no                                          | no                                         | no                                         | no                       | no               | no                                          | no                                         | no                                         | negative               | negative               |
| 21           | no                       | no               | no                                          | no                                         | no                                         | no                       | no               | no                                          | no                                         | no                                         | negative               | negative               |
| 22           | no                       | no               | no                                          | no                                         | no                                         | no                       | no               | no                                          | no                                         | no                                         | negative               | negative               |
| 23           | no                       | 6.95             | no                                          | no                                         | no                                         | no                       | 7.70             | no                                          | no                                         | no                                         | high-level             | high-level             |
| 24           | no                       | no               | no                                          | no                                         | no                                         | no                       | no               | no                                          | no                                         | no                                         | negative               | negative               |
| 25           | no                       | no               | no                                          | no                                         | no                                         | no                       | no               | no                                          | no                                         | no                                         | negative               | negative               |
| 26           | no                       | no               | no                                          | no                                         | no                                         | no                       | no               | no                                          | no                                         | no                                         | negative               | negative               |
| 27           | no                       | no               | no                                          | no                                         | no                                         | no                       | no               | no                                          | no                                         | no                                         | negative               | negative               |
| 28           | no                       | no               | no                                          | no                                         | no                                         | no                       | no               | no                                          | no                                         | no                                         | negative               | negative               |
| 29           | no                       | no               | no                                          | no                                         | no                                         | no                       | no               | no                                          | no                                         | no                                         | negative               | negative               |
| 30           | no                       | no               | no                                          | no                                         | no                                         | no                       | no               | no                                          | no                                         | no                                         | negative               | negative               |
| 31           | no                       | no               | no                                          | no                                         | no                                         | no                       | no               | no                                          | no                                         | no                                         | negative               | negative               |
| 32           | no                       | no               | no                                          | 50% $\geq 5$                               | no                                         | no                       | no               | no                                          | no                                         | 57% $\geq 4$                               | intermediate-level     | low-level              |
| 33           | no                       | no               | no                                          | 55% $\geq 5$                               | 60% $\geq 4$                               | no                       | 6.15             | no                                          | no                                         | no                                         | intermediate-level     | high-level             |
| 34           | no                       | no               | no                                          | no                                         | no                                         | no                       | no               | no                                          | no                                         | no                                         | negative               | negative               |
| 35           | no                       | no               | no                                          | no                                         | no                                         | no                       | no               | no                                          | no                                         | 52% $\geq 4$                               | negative               | low-level              |
| 36           | no                       | no               | no                                          | no                                         | no                                         | no                       | no               | no                                          | no                                         | no                                         | negative               | negative               |
| 37           | no                       | no               | no                                          | no                                         | 40% $\geq 4$                               | no                       | no               | no                                          | no                                         | 53% $\geq 4$                               | low-level              | low-level              |

**Citation:** Roberta Castiglione, Christina Alidousty, Barbara Holz, Nicolai Duerbaum, Maike Wittersheim, Elke Binot, Sabine Merkelbach-Bruse, Nicolaus Friedrichs, Matthias S Dettmer, Alexander Bosse, Reinhard Buettner and Anne Maria Schultheis. MET-FISH Evaluation Algorithm: Proposal of a Simplified Method. Journal of Cancer Science and Clinical Therapeutics 6 (2022): 411-427.

|    |      |       |           |          |          |      |       |           |             |          |                    |                    |
|----|------|-------|-----------|----------|----------|------|-------|-----------|-------------|----------|--------------------|--------------------|
| 38 | no   | no    | no        | no       | no       | no   | no    | no        | no          | no       | negative           | negative           |
| 39 | no   | no    | no        | no       | no       | no   | no    | no        | no          | no       | negative           | negative           |
| 40 | no   | no    | no        | no       | no       | no   | no    | no        | no          | no       | negative           | negative           |
| 41 | no   | no    | no        | no       | no       | no   | no    | no        | no          | no       | negative           | negative           |
| 42 | no   | no    | no        | no       | 45 % ≥ 4 | no   | no    | no        | no          | 42 % ≥ 4 | low-level          | low-level          |
| 43 | no   | no    | no        | no       | no       | no   | no    | no        | no          | no       | negative           | negative           |
| 44 | no   | no    | no        | no       | no       | no   | no    | no        | no          | no       | negative           | negative           |
| 45 | no   | no    | no        | no       | no       | no   | no    | no        | no          | no       | negative           | negative           |
| 46 | 2.21 | no    | no        | no       | no       | no   | no    | no        | no          | no       | high-level         | negative           |
| 47 | no   | no    | no        | no       | no       | no   | no    | no        | no          | no       | negative           | negative           |
| 48 | no   | no    | no        | no       | 65 % ≥ 4 | no   | no    | no        | no          | 68 % ≥ 4 | low-level          | low-level          |
| 49 | no   | no    | no        | 55 % ≥ 5 | 75 % ≥ 4 | no   | no    | no        | 53 % ≥ 5    | 75 % ≥ 4 | intermediate-level | intermediate-level |
| 50 | no   | no    | no        | no       | 65 % ≥ 4 | no   | no    | no        | no          | 62 % ≥ 4 | low-level          | low-level          |
| 51 | 4.67 | 11.21 | 65 % ≥ 15 | 80 % ≥ 5 | 85 % ≥ 4 | 4.17 | 10.58 | 28 % ≥ 15 | 82 % ≥ 5    | 83 % ≥ 4 | high-level         | high-level         |
| 52 | no   | no    | no        | no       | no       | no   | no    | no        | no          | no       | negative           | negative           |
| 53 | no   | no    | no        | no       | no       | no   | no    | no        | no          | no       | negative           | negative           |
| 54 | no   | no    | no        | no       | no       | no   | no    | no        | no          | no       | negative           | negative           |
| 55 | no   | no    | no        | no       | no       | no   | no    | no        | no          | no       | negative           | negative           |
| 56 | no   | no    | no        | no       | no       | no   | no    | no        | no          | no       | negative           | negative           |
| 57 | no   | no    | no        | no       | no       | no   | no    | no        | no          | no       | negative           | negative           |
| 58 | no   | no    | no        | no       | no       | no   | no    | no        | no          | no       | negative           | negative           |
| 59 | 2.00 | no    | no        | no       | 80 % ≥ 4 | 2.00 | 6.68  | no        | 55 % ≥ 5    | 78 % ≥ 4 | high-level         | high-level         |
| 60 | no   | no    | no        | no       | no       | no   | no    | no        | no          | no       | negative           | negative           |
| 61 | 5.64 | 11.02 | no        | 95 % ≥ 5 | 95 % ≥ 4 | 5.08 | 9.90  | no        | 93,33 % ≥ 5 | 95 % ≥ 4 | high-level         | high-level         |
| 62 | no   | no    | no        | no       | no       | no   | no    | no        | no          | no       | negative           | negative           |
| 63 | no   | no    | no        | no       | no       | no   | no    | no        | no          | no       | negative           | negative           |
| 64 | no   | no    | no        | no       | no       | no   | no    | no        | no          | no       | negative           | negative           |
| 65 | no   | no    | no        | no       | no       | no   | no    | no        | no          | no       | negative           | negative           |
| 66 | no   | no    | no        | no       | no       | no   | no    | no        | no          | no       | negative           | negative           |
| 67 | no   | no    | no        | no       | no       | no   | no    | no        | no          | no       | negative           | negative           |
| 68 | no   | 6.43  | no        | 55 % ≥ 5 | 80 % ≥ 4 | no   | 6.10  | no        | 55 % ≥ 5    | 78 % ≥ 4 | high-level         | high-level         |
| 69 | no   | no    | no        | no       | no       | no   | no    | no        | no          | no       | negative           | negative           |
| 70 | no   | no    | no        | 70 % ≥ 5 | 70 % ≥ 4 | no   | no    | no        | 52 % ≥ 5    | 68 % ≥ 4 | intermediate-level | intermediate-level |
| 71 | no   | no    | no        | no       | no       | no   | no    | no        | no          | no       | negative           | negative           |
| 72 | no   | no    | no        | no       | no       | no   | no    | no        | no          | no       | negative           | negative           |
| 73 | no   | no    | no        | no       | 40 % ≥ 4 | no   | no    | no        | no          | 42 % ≥ 4 | low-level          | low-level          |
| 74 | no   | no    | no        | no       | no       | no   | no    | no        | no          | no       | negative           | negative           |
| 75 | no   | no    | no        | 75 % ≥ 5 | 80 % ≥ 4 | no   | no    | no        | 63 % ≥ 5    | 77 % ≥ 4 | intermediate-level | intermediate-level |
| 76 | no   | no    | no        | no       | 55 % ≥ 4 | no   | no    | no        | 53 % ≥ 5    | 70 % ≥ 4 | low-level          | intermediate-level |
| 77 | no   | no    | no        | no       | no       | no   | no    | no        | no          | no       | negative           | negative           |
| 78 | no   | no    | no        | no       | no       | no   | no    | no        | no          | no       | negative           | negative           |
| 79 | no   | no    | no        | no       | no       | no   | no    | no        | no          | no       | negative           | negative           |
| 80 | no   | no    | no        | no       | no       | no   | no    | no        | no          | no       | negative           | negative           |
| 81 | no   | no    | no        | no       | no       | no   | no    | no        | no          | no       | negative           | negative           |
| 82 | no   | no    | no        | no       | no       | no   | no    | no        | no          | no       | negative           | negative           |

|     |      |       |    |          |          |      |      |    |          |          |                    |                    |
|-----|------|-------|----|----------|----------|------|------|----|----------|----------|--------------------|--------------------|
| 83  | no   | no    | no | no       | no       | no   | no   | no | no       | no       | negative           | negative           |
| 84  | 3.08 | 6.15  | no | 50 % ≥ 5 | 65 % ≥ 4 | 2.50 | no   | no | no       | 60 % ≥ 4 | high-level         | high-level         |
| 85  | no   | no    | no | no       | no       | no   | no   | no | no       | no       | negative           | negative           |
| 86  | no   | no    | no | 55 % ≥ 5 | 60 % ≥ 4 | no   | no   | no | no       | 57 % ≥ 4 | intermediate-level | low-level          |
| 87  | no   | no    | no | no       | no       | no   | no   | no | no       | no       | negative           | negative           |
| 88  | no   | no    | no | 60 % ≥ 5 | 80 % ≥ 4 | no   | no   | no | no       | 52 % ≥ 4 | intermediate-level | low-level          |
| 89  | no   | no    | no | no       | no       | no   | no   | no | no       | no       | negative           | negative           |
| 90  | no   | no    | no | no       | 65 % ≥ 4 | no   | no   | no | no       | 60 % ≥ 4 | low-level          | low-level          |
| 91  | no   | no    | no | no       | no       | no   | no   | no | no       | no       | negative           | negative           |
| 92  | no   | no    | no | no       | no       | no   | no   | no | no       | no       | negative           | negative           |
| 93  | no   | no    | no | no       | no       | no   | no   | no | no       | no       | negative           | negative           |
| 94  | no   | no    | no | no       | no       | no   | no   | no | no       | no       | negative           | negative           |
| 95  | no   | no    | no | no       | 45 % ≥ 4 | no   | no   | no | no       | 52 % ≥ 4 | low-level          | low-level          |
| 96  | no   | no    | no | no       | no       | no   | no   | no | no       | no       | negative           | negative           |
| 97  | no   | 6.55  | no | 75 % ≥ 5 | 85 % ≥ 4 | no   | no   | no | no       | 63 % ≥ 4 | high-level         | low-level          |
| 98  | no   | no    | no | no       | no       | no   | no   | no | no       | no       | negative           | negative           |
| 99  | no   | no    | no | no       | no       | no   | no   | no | no       | no       | negative           | negative           |
| 100 | no   | no    | no | no       | no       | no   | no   | no | no       | no       | negative           | negative           |
| 101 | no   | no    | no | no       | no       | no   | no   | no | no       | no       | negative           | negative           |
| 102 | no   | no    | no | no       | no       | no   | no   | no | no       | no       | negative           | negative           |
| 103 | 2.14 | no    | no | no       | no       | no   | no   | no | no       | no       | high-level         | negative           |
| 104 | no   | no    | no | no       | 45 % ≥ 4 | no   | no   | no | no       | 45 % ≥ 4 | low-level          | low-level          |
| 105 | no   | no    | no | no       | no       | no   | no   | no | no       | no       | negative           | negative           |
| 106 | no   | no    | no | 55 % ≥ 5 | 65 % ≥ 4 | no   | no   | no | 62 % ≥ 5 | 77 % ≥ 4 | intermediate-level | intermediate-level |
| 107 | no   | no    | no | no       | 40 % ≥ 4 | no   | no   | no | no       | no       | low-level          | negative           |
| 108 | no   | no    | no | no       | no       | no   | no   | no | no       | no       | negative           | negative           |
| 109 | no   | no    | no | no       | no       | no   | no   | no | no       | no       | negative           | negative           |
| 110 | no   | no    | no | no       | no       | no   | no   | no | no       | no       | negative           | negative           |
| 111 | no   | no    | no | no       | no       | no   | no   | no | no       | 45 % ≥ 4 | negative           | low-level          |
| 112 | no   | no    | no | no       | no       | no   | no   | no | no       | no       | negative           | negative           |
| 113 | no   | no    | no | no       | no       | no   | no   | no | no       | no       | negative           | negative           |
| 114 | no   | no    | no | no       | no       | no   | no   | no | no       | no       | negative           | negative           |
| 115 | no   | no    | no | no       | no       | no   | no   | no | no       | no       | negative           | negative           |
| 116 | no   | no    | no | no       | no       | no   | no   | no | no       | no       | negative           | negative           |
| 117 | no   | no    | no | no       | no       | no   | no   | no | no       | no       | negative           | negative           |
| 118 | no   | no    | no | 65 % ≥ 5 | 70 % ≥ 4 | no   | no   | no | 60 % ≥ 5 | 73 % ≥ 4 | intermediate-level | intermediate-level |
| 119 | 2.21 | no    | no | 50 % ≥ 5 | 60 % ≥ 4 | 2.55 | no   | no | 65 % ≥ 5 | 76 % ≥ 4 | high-level         | high-level         |
| 120 | no   | no    | no | no       | no       | no   | no   | no | no       | no       | negative           | negative           |
| 121 | no   | no    | no | no       | no       | no   | no   | no | no       | no       | negative           | negative           |
| 122 | no   | no    | no | no       | no       | no   | no   | no | no       | no       | negative           | negative           |
| 123 | 2.14 | 10.60 | no | 90 % ≥ 5 | 95 % ≥ 4 | 2.03 | 9.02 | no | 92 % ≥ 5 | 95 % ≥ 4 | high-level         | high-level         |
| 124 | no   | no    | no | no       | 50 % ≥ 4 | no   | no   | no | no       | 42 % ≥ 4 | low-level          | low-level          |
| 125 | no   | no    | no | no       | no       | no   | no   | no | no       | no       | negative           | negative           |
| 126 | no   | no    | no | no       | no       | no   | no   | no | no       | no       | negative           | negative           |
| 127 | no   | no    | no | no       | no       | no   | no   | no | no       | no       | negative           | negative           |

|     |      |      |    |          |          |      |      |    |          |          |                    |                    |
|-----|------|------|----|----------|----------|------|------|----|----------|----------|--------------------|--------------------|
| 128 | no   | no   | no | no       | 40 % ≥ 4 | no   | no   | no | no       | no       | low-level          | negative           |
| 129 | no   | no   | no | no       | no       | no   | no   | no | no       | no       | negative           | negative           |
| 130 | no   | no   | no | no       | no       | no   | no   | no | no       | no       | negative           | negative           |
| 131 | no   | no   | no | no       | 45 % ≥ 4 | no   | no   | no | no       | no       | low-level          | negative           |
| 132 | no   | no   | no | no       | no       | no   | no   | no | no       | no       | negative           | negative           |
| 133 | no   | no   | no | no       | no       | no   | no   | no | no       | no       | negative           | negative           |
| 134 | 2.57 | 7.70 | no | 80 % ≥ 5 | 85 % ≥ 4 | 2.35 | 6.82 | no | 73 % ≥ 5 | 90 % ≥ 4 | high-level         | high-level         |
| 135 | no   | no   | no | no       | no       | no   | no   | no | no       | no       | negative           | negative           |
| 136 | no   | no   | no | no       | 40 % ≥ 4 | no   | no   | no | no       | 43 % ≥ 4 | low-level          | low-level          |
| 137 | no   | no   | no | no       | 50 % ≥ 4 | no   | no   | no | no       | 50 % ≥ 4 | low-level          | low-level          |
| 138 | no   | no   | no | no       | no       | no   | no   | no | no       | no       | negative           | negative           |
| 139 | no   | no   | no | no       | 40 % ≥ 4 | no   | no   | no | no       | no       | low-level          | negative           |
| 140 | no   | no   | no | no       | no       | no   | no   | no | no       | no       | negative           | negative           |
| 141 | no   | no   | no | no       | no       | no   | no   | no | no       | no       | negative           | negative           |
| 142 | no   | no   | no | no       | no       | no   | no   | no | no       | no       | negative           | negative           |
| 143 | no   | no   | no | no       | no       | no   | no   | no | no       | no       | negative           | negative           |
| 144 | no   | no   | no | no       | no       | no   | no   | no | no       | no       | negative           | negative           |
| 145 | no   | no   | no | no       | no       | no   | no   | no | no       | no       | negative           | negative           |
| 146 | no   | no   | no | no       | no       | no   | no   | no | no       | no       | negative           | negative           |
| 147 | no   | no   | no | no       | no       | no   | no   | no | no       | no       | negative           | negative           |
| 148 | no   | no   | no | no       | no       | no   | no   | no | no       | no       | negative           | negative           |
| 149 | no   | no   | no | no       | no       | no   | no   | no | no       | no       | negative           | negative           |
| 150 | no   | no   | no | no       | no       | no   | no   | no | no       | 47 % ≥ 4 | negative           | low-level          |
| 151 | no   | no   | no | no       | no       | no   | no   | no | no       | no       | negative           | negative           |
| 152 | no   | no   | no | no       | no       | no   | no   | no | no       | no       | negative           | negative           |
| 153 | no   | no   | no | no       | 65 % ≥ 4 | no   | no   | no | no       | 57 % ≥ 4 | low-level          | low-level          |
| 154 | no   | no   | no | no       | no       | no   | no   | no | no       | no       | negative           | negative           |
| 155 | no   | no   | no | no       | no       | no   | no   | no | no       | no       | negative           | negative           |
| 156 | no   | no   | no | no       | no       | no   | no   | no | no       | no       | negative           | negative           |
| 157 | no   | no   | no | no       | no       | no   | no   | no | no       | no       | negative           | negative           |
| 158 | no   | no   | no | no       | 50 % ≥ 4 | no   | no   | no | no       | 50 % ≥ 4 | low-level          | low-level          |
| 159 | no   | no   | no | no       | no       | no   | no   | no | no       | no       | negative           | negative           |
| 160 | no   | no   | no | no       | no       | no   | no   | no | no       | no       | negative           | negative           |
| 161 | no   | no   | no | no       | no       | no   | no   | no | no       | no       | negative           | negative           |
| 162 | no   | no   | no | no       | no       | no   | no   | no | no       | no       | negative           | negative           |
| 163 | no   | no   | no | no       | no       | no   | no   | no | no       | no       | negative           | negative           |
| 164 | no   | no   | no | no       | no       | no   | no   | no | no       | no       | negative           | negative           |
| 165 | no   | no   | no | no       | no       | no   | no   | no | no       | no       | negative           | negative           |
| 166 | no   | no   | no | 65 % ≥ 5 | 85 % ≥ 4 | no   | no   | no | 62 % ≥ 5 | 75 % ≥ 4 | intermediate-level | intermediate-level |
| 167 | no   | no   | no | no       | no       | no   | no   | no | no       | no       | negative           | negative           |
| 168 | 2.01 | no   | no | 55 % ≥ 5 | 70 % ≥ 4 | 2.44 | no   | no | 57 % ≥ 5 | 72 % ≥ 4 | high-level         | high-level         |
| 169 | no   | no   | no | no       | no       | no   | no   | no | no       | no       | negative           | negative           |
| 170 | no   | no   | no | no       | 55 % ≥ 4 | no   | no   | no | no       | 52 % ≥ 4 | low-level          | low-level          |
| 171 | no   | no   | no | no       | no       | no   | no   | no | no       | no       | negative           | negative           |
| 172 | no   | no   | no | no       | no       | no   | no   | no | no       | no       | negative           | negative           |
| 173 | no   | no   | no | no       | no       | no   | no   | no | no       | no       | negative           | negative           |
| 174 | no   | no   | no | no       | no       | no   | no   | no | no       | no       | negative           | negative           |

|     |    |      |    |           |           |    |      |    |          |          |                    |            |
|-----|----|------|----|-----------|-----------|----|------|----|----------|----------|--------------------|------------|
| 175 | no | no   | no | no        | no        | no | no   | no | no       | no       | negative           | negative   |
| 176 | no | no   | no | no        | no        | no | no   | no | no       | no       | negative           | negative   |
| 177 | no | no   | no | no        | no        | no | no   | no | no       | no       | negative           | negative   |
| 178 | no | no   | no | no        | no        | no | no   | no | no       | no       | negative           | negative   |
| 179 | no | no   | no | no        | no        | no | no   | no | no       | no       | negative           | negative   |
| 180 | no | no   | no | no        | 45 % ≥ 4  | no | no   | no | no       | 45 % ≥ 4 | low-level          | low-level  |
| 181 | no | no   | no | no        | 50 % ≥ 4  | no | no   | no | no       | 57 % ≥ 4 | low-level          | low-level  |
| 182 | no | no   | no | no        | no        | no | no   | no | no       | no       | negative           | negative   |
| 183 | no | no   | no | no        | no        | no | no   | no | no       | no       | negative           | negative   |
| 184 | no | 8.34 | no | 100 % ≥ 5 | 100 % ≥ 4 | no | 8.25 | no | 97 % ≥ 5 | 98 % ≥ 4 | high-level         | high-level |
| 185 | no | no   | no | no        | no        | no | no   | no | no       | no       | negative           | negative   |
| 186 | no | no   | no | no        | no        | no | no   | no | no       | no       | negative           | negative   |
| 187 | no | no   | no | no        | no        | no | no   | no | no       | no       | negative           | negative   |
| 188 | no | no   | no | no        | no        | no | no   | no | no       | no       | negative           | negative   |
| 189 | no | no   | no | no        | no        | no | no   | no | no       | no       | negative           | negative   |
| 190 | no | no   | no | no        | no        | no | no   | no | no       | no       | negative           | negative   |
| 191 | no | no   | no | no        | no        | no | no   | no | no       | no       | negative           | negative   |
| 192 | no | no   | no | no        | no        | no | no   | no | no       | no       | negative           | negative   |
| 193 | no | no   | no | no        | no        | no | no   | no | no       | no       | negative           | negative   |
| 194 | no | no   | no | no        | no        | no | no   | no | no       | no       | negative           | negative   |
| 195 | no | no   | no | 50 % ≥ 5  | 75 % ≥ 4  | no | no   | no | no       | 63 % ≥ 4 | intermediate-level | low-level  |
| 196 | no | no   | no | no        | no        | no | no   | no | no       | no       | negative           | negative   |
| 197 | no | no   | no | no        | no        | no | no   | no | no       | no       | negative           | negative   |
| 198 | no | no   | no | no        | no        | no | no   | no | no       | no       | negative           | negative   |
| 199 | no | no   | no | no        | no        | no | no   | no | no       | no       | negative           | negative   |
| 200 | no | no   | no | no        | no        | no | no   | no | no       | no       | negative           | negative   |
| 201 | no | no   | no | no        | no        | no | no   | no | no       | no       | negative           | negative   |
| 202 | no | no   | no | no        | no        | no | no   | no | no       | no       | negative           | negative   |
| 203 | no | no   | no | no        | no        | no | no   | no | no       | no       | negative           | negative   |
| 204 | no | no   | no | no        | 80 % ≥ 4  | no | no   | no | no       | 65 % ≥ 4 | low-level          | low-level  |
| 205 | no | no   | no | no        | no        | no | no   | no | no       | no       | negative           | negative   |
| 206 | no | no   | no | no        | no        | no | no   | no | no       | no       | negative           | negative   |
| 207 | no | no   | no | no        | no        | no | no   | no | no       | no       | negative           | negative   |
| 208 | no | no   | no | no        | no        | no | no   | no | no       | no       | negative           | negative   |
| 209 | no | no   | no | no        | no        | no | no   | no | no       | no       | negative           | negative   |
| 210 | no | no   | no | no        | no        | no | no   | no | no       | no       | negative           | negative   |
| 211 | no | no   | no | no        | no        | no | no   | no | no       | no       | negative           | negative   |
| 212 | no | no   | no | no        | no        | no | no   | no | no       | no       | negative           | negative   |
| 213 | no | no   | no | no        | no        | no | no   | no | no       | no       | negative           | negative   |
| 214 | no | no   | no | no        | no        | no | no   | no | no       | no       | negative           | negative   |
| 215 | no | no   | no | no        | no        | no | no   | no | no       | no       | negative           | negative   |
| 216 | no | no   | no | no        | no        | no | no   | no | no       | no       | negative           | negative   |
| 217 | no | no   | no | no        | no        | no | no   | no | no       | no       | negative           | negative   |
| 218 | no | no   | no | no        | no        | no | no   | no | no       | no       | negative           | negative   |
| 219 | no | no   | no | no        | no        | no | no   | no | no       | no       | negative           | negative   |
| 220 | no | no   | no | no        | no        | no | no   | no | no       | no       | negative           | negative   |
| 221 | no | no   | no | no        | 50 % ≥ 4  | no | no   | no | no       | 45 % ≥ 4 | low-level          | low-level  |

|     |      |       |    |          |          |      |       |    |          |          |            |            |
|-----|------|-------|----|----------|----------|------|-------|----|----------|----------|------------|------------|
| 222 | no   | no    | no | no       | no       | no   | no    | no | no       | no       | negative   | negative   |
| 223 | no   | no    | no | no       | no       | no   | no    | no | no       | no       | negative   | negative   |
| 224 | no   | no    | no | no       | no       | no   | no    | no | no       | no       | negative   | negative   |
| 225 | 2.56 | 14.59 | no | 80 % ≥ 5 | 85 % ≥ 4 | 2.48 | 13.08 | no | 67 % ≥ 5 | 68 % ≥ 4 | high-level | high-level |
| 226 | no   | no    | no | no       | no       | no   | no    | no | no       | no       | negative   | negative   |
| 227 | no   | no    | no | no       | 75 % ≥ 4 | no   | no    | no | no       | 70 % ≥ 4 | low-level  | low-level  |
| 228 | no   | no    | no | no       | 50 % ≥ 4 | no   | no    | no | no       | no       | low-level  | negative   |
| 229 | no   | no    | no | no       | no       | no   | no    | no | no       | no       | negative   | negative   |
| 230 | no   | no    | no | no       | 55 % ≥ 4 | no   | no    | no | no       | 45 % ≥ 4 | low-level  | low-level  |
| 231 | no   | no    | no | no       | no       | no   | no    | no | no       | no       | negative   | negative   |
| 232 | no   | no    | no | no       | no       | no   | no    | no | no       | no       | negative   | negative   |
| 233 | no   | 7.12  | no | 95 % ≥ 5 | 95 % ≥ 4 | no   | 6.40  | no | 93 % ≥ 5 | 97 % ≥ 4 | high-level | high-level |
| 234 | no   | no    | no | no       | no       | no   | no    | no | no       | no       | negative   | negative   |
| 235 | no   | no    | no | no       | no       | no   | no    | no | no       | no       | negative   | negative   |
| 236 | no   | no    | no | no       | no       | no   | no    | no | no       | no       | negative   | negative   |
| 237 | no   | no    | no | no       | no       | no   | no    | no | no       | no       | negative   | negative   |
| 238 | no   | no    | no | no       | no       | no   | no    | no | no       | no       | negative   | negative   |
| 239 | no   | no    | no | no       | no       | no   | no    | no | no       | no       | negative   | negative   |
| 240 | no   | no    | no | no       | no       | no   | no    | no | no       | no       | negative   | negative   |
| 241 | no   | no    | no | no       | no       | no   | no    | no | no       | no       | negative   | negative   |
| 242 | no   | no    | no | no       | no       | no   | no    | no | no       | no       | negative   | negative   |
| 243 | no   | no    | no | no       | no       | no   | no    | no | no       | no       | negative   | negative   |
| 244 | no   | no    | no | no       | no       | no   | no    | no | no       | no       | negative   | negative   |
| 245 | no   | no    | no | no       | no       | no   | no    | no | no       | no       | negative   | negative   |
| 246 | no   | no    | no | no       | no       | no   | no    | no | no       | no       | negative   | negative   |
| 247 | 2.33 | no    | no | no       | 50 % ≥ 4 | no   | no    | no | no       | 50 % ≥ 4 | high-level | low-level  |
| 248 | no   | no    | no | no       | 60 % ≥ 4 | no   | no    | no | no       | 48 % ≥ 4 | low-level  | low-level  |
| 249 | no   | no    | no | no       | no       | no   | no    | no | no       | no       | negative   | negative   |
| 250 | no   | no    | no | no       | no       | no   | no    | no | no       | no       | negative   | negative   |
| 251 | no   | no    | no | no       | no       | no   | no    | no | no       | no       | negative   | negative   |
| 252 | no   | no    | no | no       | no       | no   | no    | no | no       | no       | negative   | negative   |
| 253 | no   | no    | no | no       | 60 % ≥ 4 | no   | no    | no | no       | 43 % ≥ 4 | low-level  | low-level  |
| 254 | no   | no    | no | no       | no       | no   | no    | no | no       | no       | negative   | negative   |
| 255 | no   | no    | no | no       | no       | no   | no    | no | no       | no       | negative   | negative   |
| 256 | no   | no    | no | no       | no       | no   | no    | no | no       | no       | negative   | negative   |
| 257 | no   | no    | no | no       | 45 % ≥ 4 | no   | no    | no | no       | no       | low-level  | negative   |
| 258 | no   | no    | no | no       | no       | no   | no    | no | no       | no       | negative   | negative   |
| 259 | no   | no    | no | no       | no       | no   | no    | no | no       | no       | negative   | negative   |
| 260 | no   | no    | no | no       | no       | no   | no    | no | no       | no       | negative   | negative   |
| 261 | no   | no    | no | no       | 75 % ≥ 4 | no   | no    | no | no       | 52 % ≥ 4 | low-level  | low-level  |
| 262 | no   | no    | no | no       | no       | no   | no    | no | no       | no       | negative   | negative   |
| 263 | no   | no    | no | no       | no       | no   | no    | no | no       | no       | negative   | negative   |
| 264 | no   | no    | no | no       | no       | no   | no    | no | no       | no       | negative   | negative   |
| 265 | no   | no    | no | no       | no       | no   | no    | no | no       | no       | negative   | negative   |
| 266 | no   | no    | no | no       | no       | no   | no    | no | no       | no       | negative   | negative   |
| 267 | 1.03 | no    | no | no       | no       | no   | no    | no | no       | no       | negative   | negative   |
| 268 | no   | no    | no | no       | no       | no   | no    | no | no       | no       | negative   | negative   |

|     |      |      |    |          |          |      |      |    |          |          |                    |            |
|-----|------|------|----|----------|----------|------|------|----|----------|----------|--------------------|------------|
| 269 | no   | no   | no | no       | no       | no   | no   | no | no       | 48 % ≥ 4 | negative           | low-level  |
| 270 | no   | no   | no | no       | 70 % ≥ 4 | no   | no   | no | no       | 57 % ≥ 4 | low-level          | low-level  |
| 271 | no   | no   | no | no       | 45 % ≥ 4 | no   | no   | no | no       | 45 % ≥ 4 | low-level          | low-level  |
| 272 | no   | no   | no | no       | 45 % ≥ 4 | no   | no   | no | no       | no       | low-level          | negative   |
| 273 | no   | no   | no | no       | no       | no   | no   | no | no       | no       | negative           | negative   |
| 274 | no   | no   | no | no       | no       | no   | no   | no | no       | no       | negative           | negative   |
| 275 | 2.15 | 9.94 | no | 80 % ≥ 5 | 85 % ≥ 4 | 2.04 | 9.52 | no | 85 % ≥ 5 | 88 % ≥ 4 | high-level         | high-level |
| 276 | no   | no   | no | no       | no       | no   | no   | no | no       | no       | negative           | negative   |
| 277 | no   | no   | no | no       | no       | no   | no   | no | no       | no       | negative           | negative   |
| 278 | no   | no   | no | no       | no       | no   | no   | no | no       | no       | negative           | negative   |
| 279 | no   | no   | no | no       | no       | no   | no   | no | no       | no       | negative           | negative   |
| 280 | no   | no   | no | no       | no       | no   | no   | no | no       | no       | negative           | negative   |
| 281 | no   | no   | no | no       | no       | no   | no   | no | no       | no       | negative           | negative   |
| 282 | no   | no   | no | no       | no       | no   | no   | no | no       | no       | negative           | negative   |
| 283 | no   | no   | no | 60 % ≥ 5 | 75 % ≥ 4 | no   | no   | no | no       | 70 % ≥ 4 | intermediate-level | low-level  |
| 284 | no   | no   | no | no       | no       | no   | no   | no | no       | no       | negative           | negative   |
| 285 | no   | 7.85 | no | 75 % ≥ 5 | 80 % ≥ 4 | 2.04 | 6.63 | no | 65 % ≥ 5 | 80 % ≥ 4 | high-level         | high-level |
| 286 | no   | no   | no | no       | no       | no   | no   | no | no       | no       | negative           | negative   |
| 287 | no   | no   | no | no       | no       | no   | no   | no | no       | no       | negative           | negative   |
| 288 | no   | no   | no | no       | no       | no   | no   | no | no       | no       | negative           | negative   |
| 289 | no   | no   | no | no       | no       | no   | no   | no | no       | no       | negative           | negative   |
| 290 | no   | no   | no | no       | no       | no   | no   | no | no       | no       | negative           | negative   |
| 291 | no   | no   | no | no       | no       | no   | no   | no | no       | no       | negative           | negative   |
| 292 | no   | no   | no | no       | no       | no   | no   | no | no       | no       | negative           | negative   |
| 293 | no   | no   | no | 50 % ≥ 5 | 80 % ≥ 4 | no   | no   | no | no       | 62 % ≥ 4 | intermediate-level | low-level  |
| 294 | no   | no   | no | no       | no       | no   | no   | no | no       | no       | negative           | negative   |
| 295 | no   | no   | no | no       | no       | no   | no   | no | no       | no       | negative           | negative   |
| 296 | no   | no   | no | no       | no       | no   | no   | no | no       | no       | negative           | negative   |
| 297 | no   | no   | no | no       | no       | no   | no   | no | no       | no       | negative           | negative   |
| 298 | no   | no   | no | no       | no       | no   | no   | no | no       | no       | negative           | negative   |
| 299 | no   | no   | no | no       | no       | no   | no   | no | no       | no       | negative           | negative   |
| 300 | no   | no   | no | no       | no       | no   | no   | no | no       | no       | negative           | negative   |
| 301 | no   | no   | no | no       | no       | no   | no   | no | no       | no       | negative           | negative   |
| 302 | no   | no   | no | no       | no       | no   | no   | no | no       | no       | negative           | negative   |
| 303 | no   | no   | no | no       | no       | no   | no   | no | no       | no       | negative           | negative   |
| 304 | no   | no   | no | no       | no       | no   | no   | no | no       | no       | negative           | negative   |
| 305 | no   | no   | no | no       | no       | no   | no   | no | no       | no       | negative           | negative   |
| 306 | no   | no   | no | no       | no       | no   | no   | no | no       | no       | negative           | negative   |
| 307 | no   | no   | no | no       | no       | no   | no   | no | no       | no       | negative           | negative   |
| 308 | no   | no   | no | no       | no       | no   | no   | no | no       | no       | negative           | negative   |
| 309 | no   | no   | no | no       | no       | no   | no   | no | no       | no       | negative           | negative   |
| 310 | no   | no   | no | no       | no       | no   | no   | no | no       | no       | negative           | negative   |
| 311 | no   | no   | no | no       | no       | no   | no   | no | no       | no       | negative           | negative   |
| 312 | no   | no   | no | no       | no       | no   | no   | no | no       | no       | negative           | negative   |
| 313 | no   | no   | no | no       | no       | no   | no   | no | no       | no       | negative           | negative   |
| 314 | no   | no   | no | no       | no       | no   | no   | no | no       | no       | negative           | negative   |

|     |      |       |    |          |          |      |      |    |          |          |                    |                    |
|-----|------|-------|----|----------|----------|------|------|----|----------|----------|--------------------|--------------------|
| 315 | no   | no    | no | no       | 40 % ≥ 4 | no   | no   | no | no       | no       | low-level          | negative           |
| 316 | no   | no    | no | no       | no       | no   | no   | no | no       | no       | negative           | negative           |
| 317 | no   | no    | no | no       | no       | no   | no   | no | no       | no       | negative           | negative           |
| 318 | no   | no    | no | no       | no       | no   | no   | no | no       | no       | negative           | negative           |
| 319 | no   | no    | no | no       | no       | no   | no   | no | no       | no       | negative           | negative           |
| 320 | no   | no    | no | no       | no       | no   | no   | no | no       | no       | negative           | negative           |
| 321 | no   | no    | no | no       | no       | no   | no   | no | no       | no       | negative           | negative           |
| 322 | no   | no    | no | no       | 40 % ≥ 4 | no   | no   | no | no       | no       | low-level          | negative           |
| 323 | no   | no    | no | no       | no       | no   | no   | no | no       | no       | negative           | negative           |
| 324 | no   | no    | no | no       | no       | no   | no   | no | no       | no       | negative           | negative           |
| 325 | no   | no    | no | no       | no       | no   | no   | no | no       | no       | negative           | negative           |
| 326 | no   | no    | no | no       | no       | no   | no   | no | no       | no       | negative           | negative           |
| 327 | no   | no    | no | no       | no       | no   | no   | no | no       | no       | negative           | negative           |
| 328 | no   | no    | no | no       | no       | no   | no   | no | no       | no       | negative           | negative           |
| 329 | no   | no    | no | no       | no       | no   | no   | no | no       | no       | negative           | negative           |
| 330 | no   | no    | no | no       | no       | no   | no   | no | no       | no       | negative           | negative           |
| 331 | no   | no    | no | no       | no       | no   | no   | no | no       | no       | negative           | negative           |
| 332 | no   | no    | no | no       | no       | no   | no   | no | no       | no       | negative           | negative           |
| 333 | no   | no    | no | no       | no       | no   | no   | no | no       | no       | negative           | negative           |
| 334 | no   | no    | no | no       | no       | no   | no   | no | no       | no       | negative           | negative           |
| 335 | no   | no    | no | no       | no       | no   | no   | no | no       | no       | negative           | negative           |
| 336 | no   | no    | no | no       | no       | no   | no   | no | no       | no       | negative           | negative           |
| 337 | 4.51 | 7.45  | no | 85 % ≥ 5 | 90 % ≥ 4 | 4.23 | 7.33 | no | 87 % ≥ 5 | 92 % ≥ 4 | high-level         | high-level         |
| 338 | no   | no    | no | no       | no       | no   | no   | no | no       | no       | negative           | negative           |
| 339 | no   | no    | no | no       | no       | no   | no   | no | no       | no       | negative           | negative           |
| 340 | no   | no    | no | no       | no       | no   | no   | no | no       | no       | negative           | negative           |
| 341 | no   | no    | no | no       | no       | no   | no   | no | no       | no       | negative           | negative           |
| 342 | no   | no    | no | no       | no       | no   | no   | no | no       | no       | negative           | negative           |
| 343 | no   | no    | no | no       | no       | no   | no   | no | no       | no       | negative           | negative           |
| 344 | no   | no    | no | no       | no       | no   | no   | no | no       | no       | negative           | negative           |
| 345 | no   | no    | no | no       | no       | no   | no   | no | no       | no       | negative           | negative           |
| 346 | no   | no    | no | no       | no       | no   | no   | no | no       | no       | negative           | negative           |
| 347 | no   | no    | no | no       | no       | no   | no   | no | no       | no       | negative           | negative           |
| 348 | no   | no    | no | no       | 50 % ≥ 4 | no   | no   | no | no       | 62 % ≥ 4 | low-level          | low-level          |
| 349 | no   | no    | no | no       | 55 % ≥ 4 | no   | no   | no | 52 % ≥ 5 | 63 % ≥ 4 | low-level          | intermediate-level |
| 350 | no   | no    | no | no       | no       | no   | no   | no | no       | no       | negative           | negative           |
| 351 | no   | no    | no | no       | no       | no   | no   | no | no       | no       | negative           | negative           |
| 352 | no   | no    | no | no       | no       | no   | no   | no | no       | no       | negative           | negative           |
| 353 | no   | no    | no | no       | no       | no   | no   | no | no       | no       | negative           | negative           |
| 354 | 2.75 | 10.05 | no | 80 % ≥ 5 | 80 % ≥ 4 | 3.01 | 9.93 | no | 80 % ≥ 5 | 87 % ≥ 4 | high-level         | high-level         |
| 355 | no   | no    | no | 55 % ≥ 5 | 80 % ≥ 4 | no   | no   | no | no       | 67 % ≥ 4 | intermediate-level | low-level          |
| 356 | no   | no    | no | no       | no       | no   | no   | no | no       | no       | negative           | negative           |
| 357 | no   | no    | no | no       | no       | no   | no   | no | no       | no       | negative           | negative           |
| 358 | no   | no    | no | no       | no       | no   | no   | no | no       | no       | negative           | negative           |
| 359 | no   | no    | no | no       | no       | no   | no   | no | no       | no       | negative           | negative           |
| 360 | no   | no    | no | no       | no       | no   | no   | no | no       | no       | negative           | negative           |



|     |      |       |           |          |           |      |       |           |          |          |                    |                    |
|-----|------|-------|-----------|----------|-----------|------|-------|-----------|----------|----------|--------------------|--------------------|
| 361 | no   | no    | no        | no       | no        | no   | no    | no        | no       | no       | negative           | negative           |
| 362 | no   | no    | no        | no       | no        | no   | no    | no        | no       | no       | negative           | negative           |
| 363 | no   | no    | no        | no       | no        | no   | no    | no        | no       | no       | negative           | negative           |
| 364 | no   | no    | no        | no       | no        | no   | no    | no        | no       | no       | negative           | negative           |
| 365 | no   | no    | no        | no       | no        | no   | no    | no        | no       | no       | negative           | negative           |
| 366 | no   | no    | no        | no       | no        | no   | no    | no        | no       | no       | negative           | negative           |
| 367 | no   | no    | no        | no       | no        | no   | no    | no        | no       | no       | negative           | negative           |
| 368 | no   | no    | no        | no       | 65 % ≥ 4  | no   | no    | no        | no       | 58 % ≥ 4 | low-level          | low-level          |
| 369 | no   | no    | no        | no       | 55 % ≥ 4  | no   | no    | no        | no       | 55 % ≥ 4 | low-level          | low-level          |
| 370 | no   | 8.00  | no        | 60 % ≥ 5 | 60 % ≥ 4  | 2.33 | 10.28 | no        | 75 % ≥ 5 | 78 % ≥ 4 | high-level         | high-level         |
| 371 | no   | no    | no        | no       | 55 % ≥ 4  | no   | no    | no        | no       | 58 % ≥ 4 | low-level          | low-level          |
| 372 | no   | no    | no        | no       | no        | no   | no    | no        | no       | no       | negative           | negative           |
| 373 | no   | no    | no        | 50 % ≥ 5 | 65 % ≥ 4  | no   | no    | no        | no       | 52 % ≥ 4 | intermediate-level | low-level          |
| 374 | no   | no    | no        | no       | no        | no   | no    | no        | no       | no       | negative           | negative           |
| 375 | no   | no    | no        | no       | no        | no   | no    | no        | no       | no       | negative           | negative           |
| 376 | no   | no    | no        | no       | no        | no   | no    | no        | no       | no       | negative           | negative           |
| 377 | no   | no    | no        | no       | no        | no   | no    | no        | no       | no       | negative           | negative           |
| 378 | no   | no    | 10 % ≥ 15 | 50 % ≥ 5 | 80 % ≥ 4  | no   | no    | no        | no       | 65 % ≥ 4 | high-level         | low-level          |
| 379 | no   | no    | no        | no       | no        | no   | no    | no        | no       | no       | negative           | negative           |
| 380 | no   | 6.39  | 10 % ≥ 15 | no       | 60 % ≥ 4  | no   | no    | no        | 53 % ≥ 5 | 72 % ≥ 4 | high-level         | intermediate-level |
| 381 | 2.44 | 11.25 | 10 % ≥ 15 | 90 % ≥ 5 | 100 % ≥ 4 | no   | 8.55  | 10 % ≥ 15 | 77 % ≥ 5 | 87 % ≥ 4 | high-level         | high-level         |
| 382 | no   | no    | no        | no       | no        | no   | no    | no        | no       | no       | negative           | negative           |
| 383 | no   | no    | no        | no       | no        | no   | no    | no        | no       | no       | negative           | negative           |
| 384 | no   | no    | no        | no       | no        | no   | no    | no        | no       | no       | negative           | negative           |
| 385 | no   | no    | no        | no       | no        | no   | no    | no        | no       | no       | negative           | negative           |
| 386 | no   | no    | no        | no       | no        | no   | no    | no        | no       | no       | negative           | negative           |
| 387 | no   | no    | no        | no       | no        | no   | no    | no        | no       | 48 % ≥ 4 | negative           | low-level          |
| 388 | no   | no    | no        | no       | no        | no   | no    | no        | no       | no       | negative           | negative           |
| 389 | no   | no    | no        | no       | no        | no   | no    | no        | no       | no       | negative           | negative           |
| 390 | no   | no    | no        | no       | no        | no   | no    | no        | no       | no       | negative           | negative           |
| 391 | no   | no    | no        | no       | no        | no   | no    | no        | no       | no       | negative           | negative           |
| 392 | no   | no    | no        | no       | 50 % ≥ 4  | no   | no    | no        | no       | 60 % ≥ 4 | low-level          | low-level          |
| 393 | no   | no    | no        | no       | no        | no   | no    | no        | no       | no       | negative           | negative           |
| 394 | no   | no    | no        | no       | 70 % ≥ 4  | no   | no    | no        | no       | 70 % ≥ 4 | low-level          | low-level          |
| 395 | no   | no    | no        | no       | no        | no   | no    | no        | no       | no       | negative           | negative           |
| 396 | no   | 6.45  | no        | 80 % ≥ 5 | 95 % ≥ 4  | no   | no    | no        | 65 % ≥ 5 | 80 % ≥ 4 | high-level         | intermediate-level |
| 397 | no   | no    | no        | no       | no        | no   | no    | no        | no       | no       | negative           | negative           |
| 398 | no   | no    | no        | no       | no        | no   | no    | no        | no       | no       | negative           | negative           |
| 399 | no   | no    | no        | no       | no        | no   | no    | no        | no       | no       | negative           | negative           |
| 400 | no   | no    | no        | no       | no        | no   | no    | no        | no       | no       | negative           | negative           |
| 401 | no   | no    | no        | no       | no        | no   | no    | no        | no       | no       | negative           | negative           |
| 402 | no   | 6.12  | 10 % ≥ 15 | 75 % ≥ 5 | 90 % ≥ 4  | no   | 6.10  | no        | 80 % ≥ 5 | 93 % ≥ 4 | high-level         | high-level         |
| 403 | no   | no    | no        | no       | no        | no   | no    | no        | no       | no       | negative           | negative           |
| 404 | no   | no    | no        | no       | no        | no   | no    | no        | no       | no       | negative           | negative           |
| 405 | no   | no    | no        | no       | no        | no   | no    | no        | no       | no       | negative           | negative           |

|     |    |      |    |          |           |    |      |           |          |          |                    |                    |
|-----|----|------|----|----------|-----------|----|------|-----------|----------|----------|--------------------|--------------------|
| 406 | no | no   | no | no       | 55 % ≥ 4  | no | no   | no        | no       | 40 % ≥ 4 | low-level          | low-level          |
| 407 | no | no   | no | no       | no        | no | no   | no        | no       | no       | negative           | negative           |
| 408 | no | no   | no | no       | no        | no | no   | no        | no       | no       | negative           | negative           |
| 409 | no | no   | no | no       | no        | no | no   | no        | no       | no       | negative           | negative           |
| 410 | no | no   | no | no       | no        | no | no   | no        | no       | 47 % ≥ 4 | negative           | low-level          |
| 411 | no | no   | no | no       | 55 % ≥ 4  | no | no   | no        | no       | 53 ≥ 4   | low-level          | low-level          |
| 412 | no | no   | no | no       | no        | no | no   | no        | no       | no       | negative           | negative           |
| 413 | no | 6.00 | no | 65 % ≥ 5 | 90 % ≥ 4  | no | 6.50 | 22 % ≥ 15 | 72 % ≥ 5 | 85 % ≥ 4 | high-level         | high-level         |
| 414 | no | no   | no | no       | no        | no | no   | no        | no       | no       | negative           | negative           |
| 415 | no | no   | no | no       | no        | no | no   | no        | no       | no       | negative           | negative           |
| 416 | no | no   | no | no       | no        | no | no   | no        | no       | no       | negative           | negative           |
| 417 | no | 6.32 | no | 80 % ≥ 5 | 100 % ≥ 4 | no | 6.03 | no        | 78 % ≥ 5 | 90 % ≥ 4 | high-level         | high-level         |
| 418 | no | no   | no | no       | no        | no | no   | no        | no       | no       | negative           | negative           |
| 419 | no | no   | no | no       | no        | no | no   | no        | no       | no       | negative           | negative           |
| 420 | no | no   | no | no       | no        | no | no   | no        | no       | no       | negative           | negative           |
| 421 | no | no   | no | no       | no        | no | no   | no        | no       | no       | negative           | negative           |
| 422 | no | no   | no | no       | no        | no | no   | no        | no       | no       | negative           | negative           |
| 423 | no | no   | no | no       | no        | no | no   | no        | no       | no       | negative           | negative           |
| 424 | no | no   | no | no       | 45 % ≥ 4  | no | no   | no        | no       | 47 % ≥ 4 | low-level          | low-level          |
| 425 | no | no   | no | no       | no        | no | no   | no        | no       | no       | negative           | negative           |
| 426 | no | no   | no | no       | no        | no | no   | no        | no       | no       | negative           | negative           |
| 427 | no | no   | no | no       | no        | no | no   | no        | no       | no       | negative           | negative           |
| 428 | no | no   | no | no       | no        | no | no   | no        | no       | no       | negative           | negative           |
| 429 | no | no   | no | no       | no        | no | no   | no        | no       | no       | negative           | negative           |
| 430 | no | no   | no | 75 % ≥ 5 | 85 % ≥ 4  | no | no   | no        | 65 % ≥ 5 | 85 % ≥ 4 | intermediate-level | intermediate-level |
| 431 | no | no   | no | no       | no        | no | no   | no        | no       | no       | negative           | negative           |
| 432 | no | no   | no | no       | no        | no | no   | no        | no       | no       | negative           | negative           |
| 433 | no | no   | no | no       | no        | no | no   | no        | no       | no       | negative           | negative           |
| 434 | no | no   | no | no       | no        | no | no   | no        | no       | no       | negative           | negative           |
| 435 | no | no   | no | no       | no        | no | no   | no        | no       | no       | negative           | negative           |
| 436 | no | no   | no | no       | no        | no | no   | no        | no       | no       | negative           | negative           |
| 437 | no | no   | no | no       | no        | no | no   | no        | no       | no       | negative           | negative           |
| 438 | no | no   | no | no       | no        | no | no   | no        | no       | no       | negative           | negative           |
| 439 | no | no   | no | no       | no        | no | no   | no        | no       | no       | negative           | negative           |
| 440 | no | no   | no | no       | no        | no | no   | no        | no       | no       | negative           | negative           |
| 441 | no | no   | no | no       | no        | no | no   | no        | no       | no       | negative           | negative           |
| 442 | no | no   | no | no       | no        | no | no   | no        | no       | no       | negative           | negative           |
| 443 | no | no   | no | no       | no        | no | no   | no        | no       | no       | negative           | negative           |
| 444 | no | no   | no | no       | no        | no | no   | no        | no       | no       | negative           | negative           |
| 445 | no | no   | no | no       | no        | no | no   | no        | no       | no       | negative           | negative           |
| 446 | no | no   | no | no       | no        | no | no   | no        | no       | no       | negative           | negative           |
| 447 | no | no   | no | no       | no        | no | no   | no        | no       | no       | negative           | negative           |
| 448 | no | no   | no | no       | no        | no | no   | no        | no       | no       | negative           | negative           |
| 449 | no | no   | no | no       | no        | no | no   | no        | no       | no       | negative           | negative           |
| 450 | no | no   | no | no       | 50 % ≥ 4  | no | no   | no        | no       | 62 % ≥ 4 | low-level          | low-level          |
| 451 | no | no   | no | no       | no        | no | no   | no        | no       | no       | negative           | negative           |

|     |      |      |           |          |          |      |      |           |          |          |                    |            |
|-----|------|------|-----------|----------|----------|------|------|-----------|----------|----------|--------------------|------------|
| 452 | no   | no   | no        | no       | no       | no   | no   | no        | no       | no       | negative           | negative   |
| 453 | no   | no   | no        | no       | no       | no   | no   | no        | no       | no       | negative           | negative   |
| 454 | no   | no   | no        | no       | no       | no   | no   | no        | no       | no       | negative           | negative   |
| 455 | no   | no   | no        | no       | 45 % ≥ 4 | no   | no   | no        | no       | 50 % ≥ 4 | low-level          | low-level  |
| 456 | no   | no   | no        | no       | no       | no   | no   | no        | no       | no       | negative           | negative   |
| 457 | no   | no   | no        | no       | no       | no   | no   | no        | no       | no       | negative           | negative   |
| 458 | no   | no   | no        | no       | no       | no   | no   | no        | no       | no       | negative           | negative   |
| 459 | no   | no   | no        | no       | no       | no   | no   | no        | no       | no       | negative           | negative   |
| 460 | no   | no   | no        | no       | no       | no   | no   | no        | no       | no       | negative           | negative   |
| 461 | no   | no   | no        | no       | no       | no   | no   | no        | no       | no       | negative           | negative   |
| 462 | no   | no   | no        | no       | no       | no   | no   | no        | no       | no       | negative           | negative   |
| 463 | no   | no   | no        | no       | no       | no   | no   | no        | no       | no       | negative           | negative   |
| 464 | no   | no   | no        | no       | no       | no   | no   | no        | no       | no       | negative           | negative   |
| 465 | 2.34 | 6.40 | 20 % ≥ 10 | 75 % ≥ 5 | 80 % ≥ 4 | 2.66 | 6.54 | 15 % ≥ 10 | 74 % ≥ 5 | 85 % ≥ 4 | high-level         | high-level |
| 466 | no   | no   | no        | no       | no       | no   | no   | no        | no       | no       | negative           | negative   |
| 467 | no   | no   | no        | no       | no       | no   | no   | no        | no       | no       | negative           | negative   |
| 468 | no   | no   | no        | no       | 45 % ≥ 4 | no   | no   | no        | no       | 51 % ≥ 4 | low-level          | low-level  |
| 469 | no   | no   | no        | no       | no       | no   | no   | no        | no       | no       | negative           | negative   |
| 470 | no   | no   | no        | no       | no       | no   | no   | no        | no       | no       | negative           | negative   |
| 471 | no   | no   | no        | no       | no       | no   | no   | no        | no       | no       | negative           | negative   |
| 472 | no   | no   | no        | no       | no       | no   | no   | no        | no       | no       | negative           | negative   |
| 473 | no   | no   | no        | no       | no       | no   | no   | no        | no       | no       | negative           | negative   |
| 474 | no   | no   | no        | no       | no       | no   | no   | no        | no       | no       | negative           | negative   |
| 475 | no   | no   | no        | no       | no       | no   | no   | no        | no       | no       | negative           | negative   |
| 476 | no   | no   | no        | no       | 40 % ≥ 4 | no   | no   | no        | no       | 43 % ≥ 4 | low-level          | low-level  |
| 477 | no   | no   | no        | 50 % ≥ 5 | 60 % ≥ 4 | no   | no   | no        | no       | 53 % ≥ 4 | intermediate-level | low-level  |
| 478 | no   | no   | no        | no       | no       | no   | no   | no        | no       | no       | negative           | negative   |
| 479 | no   | no   | no        | no       | no       | no   | no   | no        | no       | no       | negative           | negative   |
| 480 | no   | no   | no        | no       | no       | no   | no   | no        | no       | no       | negative           | negative   |
| 481 | no   | no   | no        | no       | no       | no   | no   | no        | no       | no       | negative           | negative   |
| 482 | no   | no   | no        | no       | no       | no   | no   | no        | no       | no       | negative           | negative   |
| 483 | no   | 8.60 | 35 % ≥ 10 | 90 % ≥ 5 | 95 % ≥ 4 | no   | 8.02 | 23 % ≥ 10 | 93 % ≥ 5 | 97 % ≥ 4 | high-level         | high-level |
| 484 | no   | no   | no        | no       | no       | no   | no   | no        | no       | no       | negative           | negative   |
| 485 | no   | no   | no        | no       | no       | no   | no   | no        | no       | no       | negative           | negative   |
| 486 | no   | no   | no        | no       | no       | no   | no   | no        | no       | no       | negative           | negative   |
| 487 | no   | no   | no        | no       | no       | no   | no   | no        | no       | no       | negative           | negative   |
| 488 | no   | no   | no        | no       | no       | no   | no   | no        | no       | no       | negative           | negative   |
| 489 | no   | no   | no        | no       | 45 % ≥ 4 | no   | no   | no        | no       | 55 % ≥ 4 | low-level          | low-level  |
| 490 | no   | no   | no        | no       | no       | no   | no   | no        | no       | no       | negative           | negative   |
| 491 | no   | no   | no        | no       | no       | no   | no   | no        | no       | no       | negative           | negative   |
| 492 | no   | no   | no        | no       | no       | no   | no   | no        | no       | no       | negative           | negative   |
| 493 | no   | no   | no        | no       | no       | no   | no   | no        | no       | no       | negative           | negative   |
| 494 | no   | no   | no        | no       | no       | no   | no   | no        | no       | no       | negative           | negative   |
| 495 | no   | no   | no        | no       | no       | no   | no   | no        | no       | no       | negative           | negative   |
| 496 | no   | no   | no        | no       | no       | no   | no   | no        | no       | no       | negative           | negative   |
| 497 | no   | no   | no        | no       | 80 % ≥ 4 | no   | no   | no        | no       | 72 % ≥ 4 | low-level          | low-level  |
